# Supplementary material
Source: PubMed Central journal article supplement (PMC5019071)
Supplement: JB.00265-16_zjb999094174so1.pdf [file JB.00265-16_zjb999094174so1.pdf]

## **SUPPLEMENTARY MATERIAL**

### **Spermidine Inversely Influences Surface Interactions and Planktonic Growth**

#### **in *Agrobacterium tumefaciens***

Yi Wang, Sok Ho Kim, Ramya Natarajan, Jason E. Heindl, Eric L. Bruger,

Christopher M. Waters, Anthony J. Michael and Clay Fuqua

Running title: Polyamines and *Agrobacterium* surface adherence

1) Supplementary Figures – S1-S6

2) Supplementary Figure Legends

3) Supplementary Tables – S1-S2

4) Supplementary References

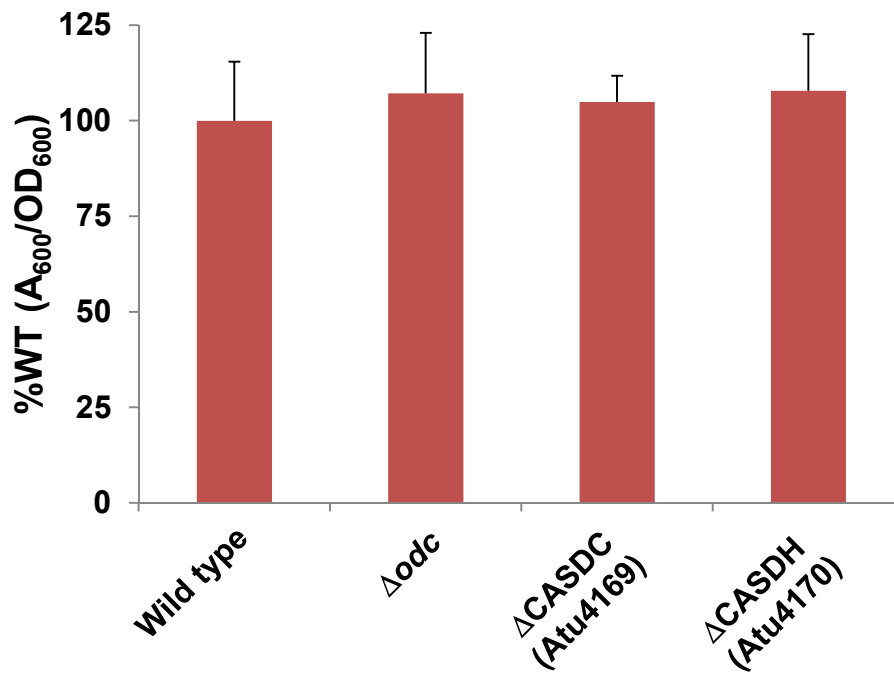

**Figure S1. Biofilm formation of *A. tumefaciens* polyamine mutants in rich medium.** Biofilm assays on coverslips in LB medium. *A. tumefaciens* C58 and derivatives incubated in 12-well plates with PVC coverslips for 96 h at 28°C. After rinsing, coverslips were stained with 1% crystal violet and adherent biomass measured as absorbance of acetic acid-solubilized crystal violet, normalized for planktonic culture growth ( $A_{600}/OD_{600}$ ). Error bars show the standard deviation of a minimum of three biological replicates.

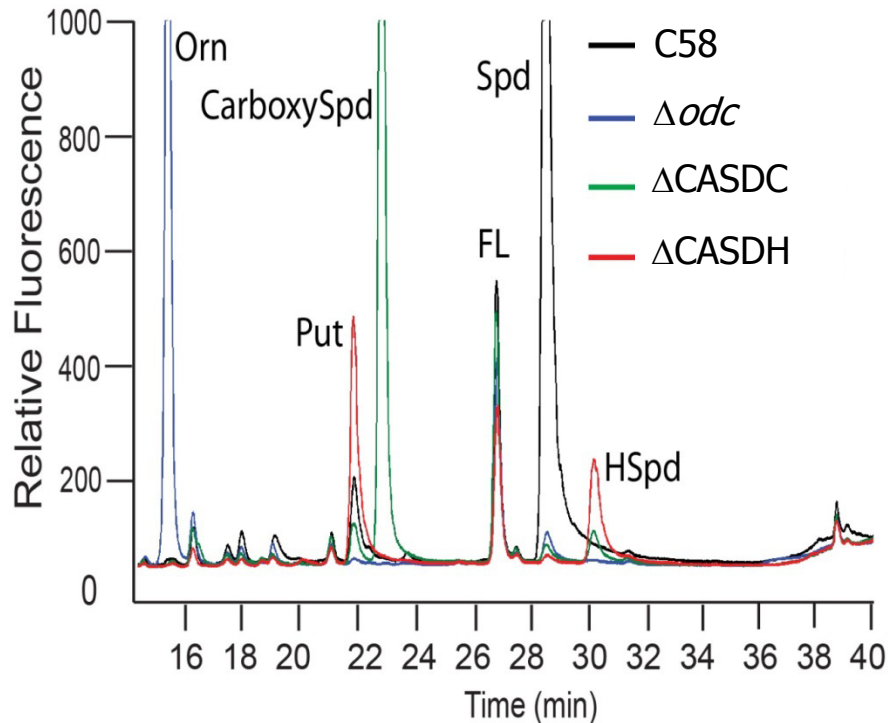

**Figure S2. *A. tumefaciens* CASDH- mutant synthesizes homospermidine via the *hss* gene product.** Polyamines were prepared from whole cell extracts, labeled with the AccQ-fluor, fractionated over a hydrolysate amino acid analysis HPLC column with an acetonitrile gradient. Polyamine and ornithine peaks were detected using an in-line fluorescence detector (excitation, 248 nm; emission, 398 nm). Orn, ornithine; Put, putrescine; FL, unconjugated AccQ fluor; SPD, spermidine; Hspd, homospermidine.

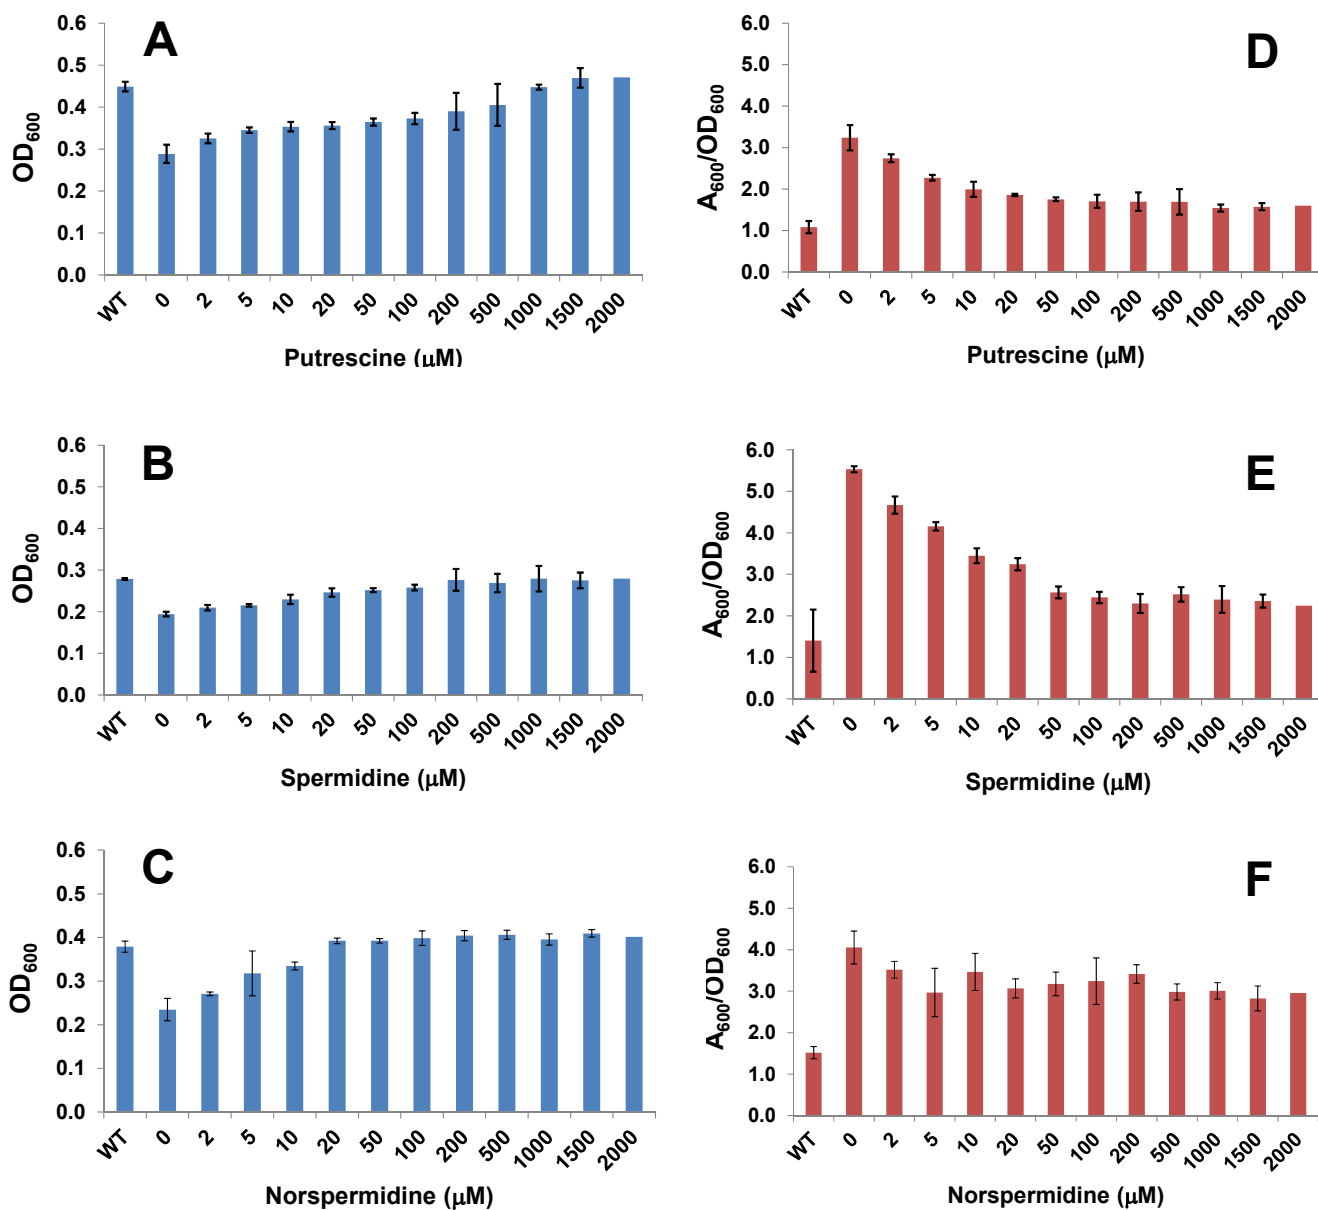

**Figure S3. Rescue of growth and reversal of increased biofilm formation in the  $\Delta odc$  mutant by exogenous polyamines.**

Exogenous putrescine (A and D), spermidine (B and E) and norspermidine (C and F) were tested across the indicated concentration range for their impact on 48 h biofilm cultures of the *Dodc* mutant in 12-well plates for planktonic growth (OD<sub>600</sub>, A, B,C) and biofilm formation on PVC coverslips with solubilized CV normalized to the planktonic culture density (A<sub>600</sub>/OD<sub>600</sub>). Error bars show the standard deviation of a minimum of three biological replicates.

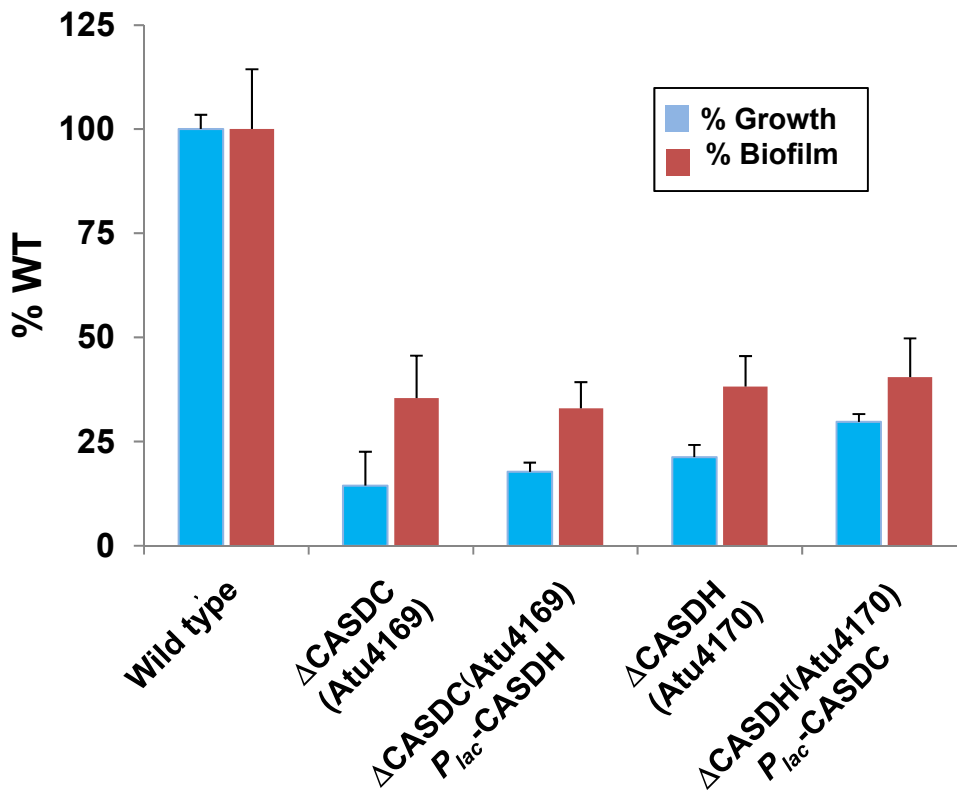

**Figure S4. Plasmid-borne copies of CASDH and CASDC do not rescue each other's null mutations.** Growth measured by  $OD_{600}$  (blue bars) and biofilm formation as  $A_{600}/OD_{600}$  (red bars), assayed as in Fig. S1 for *A. tumefaciens* C58 and derivatives. Plasmid harboring strains were induced with 500  $\mu$ M IPTG. Values expressed as percent wild type. Error bars show the standard deviation of a minimum of three biological replicates.

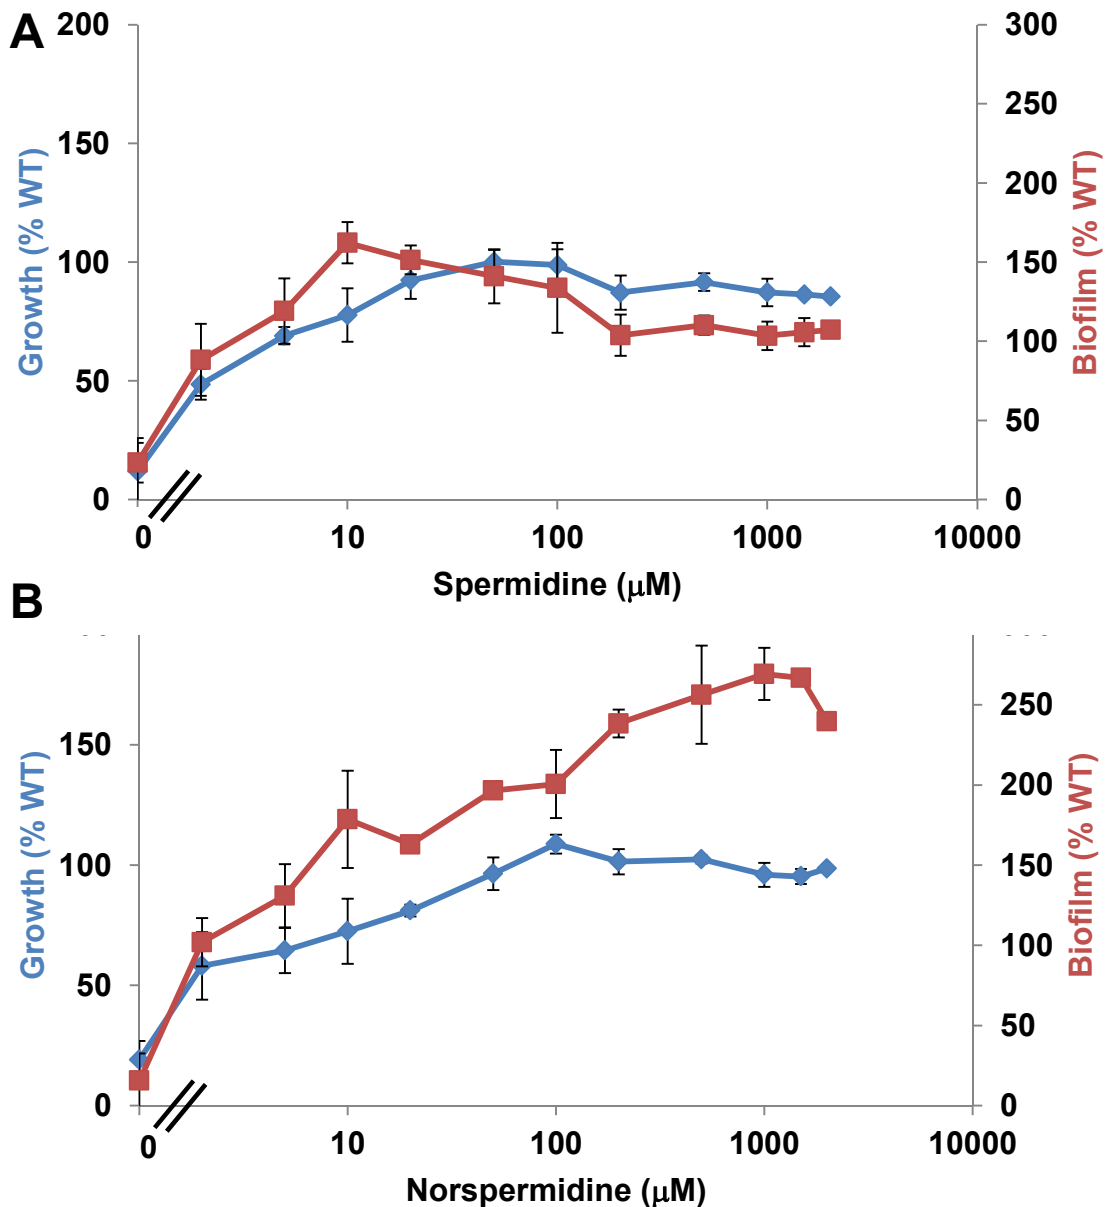

**Figure S5. Growth rescue and biofilm control of the CASDH mutant by spermidine and norspermidine.** Growth of the DCASDH mutant with spermidine (A) and norspermidine (B) measured by  $\text{OD}_{600}$  and biofilm formation as assayed as in Fig. S1. All values expressed as %WT and error bars show the standard deviation of a minimum of three biological replicates.. For the samples with no supplemental polyamines  $A_{600}$  readings were used instead of  $A_{600}/\text{OD}_{600}$  to avoid the very low growth due to polyamine auxotrophy from artificially inflating the reading.

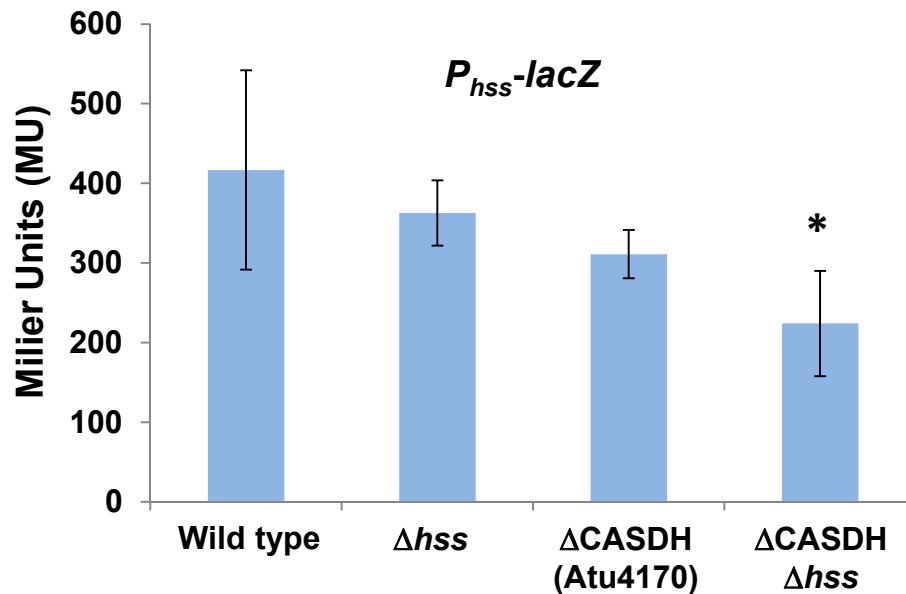

**Figure S6. Expression of *hss* gene is not activated under conditions that cause elevated Hspd levels.** b-galactosidase specific activity presented in Miller Units from ATGN-grown cultures in *A. tumefaciens* C58 and derivatives harboring a plasmid-borne  $P_{hss}-lacZ$  fusion. Error bars show the standard deviation of a minimum of three biological replicates. P value, \*, ( $< 0.06$ )

## Supplementary Figure Legends

**Figure S1. Biofilm formation of *A. tumefaciens* polyamine mutants in rich medium.** Biofilm assays on coverslips in LB medium. *A. tumefaciens* C58 and derivatives incubated in 12-well plates with PVC coverslips for 96 h at 28°C. After rinsing, coverslips were stained with 1% crystal violet and adherent biomass measured as absorbance of acetic acid-solubilized crystal violet, normalized for planktonic culture growth ( $A_{600}/OD_{600}$ ). Error bars show the standard deviation of a minimum of three biological replicates.

**Figure S2. *A. tumefaciens* CASDH- mutant synthesizes homospermidine via the *hss* gene product.** Polyamines were prepared from whole cell extracts, labeled with the AccQ-fluor, fractionated over a hydrolysate amino acid analysis HPLC column with an acetonitrile gradient. Polyamine and ornithine peaks were detected using an in-line fluorescence detector (excitation, 248 nm; emission, 398 nm). Orn, ornithine; Put, putrescine; FL, unconjugated AccQ fluor; SPD, spermidine; Hspd, homospermidine.

**Figure S3. Rescue of growth and reversal of increased biofilm formation in the  $\Delta odc$  mutant by exogenous polyamines.** Exogenous putrescine (A and D), spermidine (B and E) and norspermidine (C and F) were tested across the indicated concentration range for their impact on 48 h biofilm cultures of the  $\Delta odc$  mutant in 12-well plates for planktonic growth ( $OD_{600}$ , A, B,C) and biofilm formation on PVC coverslips (as in Fig. 2) with solubilized CV normalized to the planktonic culture density



( $A_{600}/OD_{600}$ ). Error bars show the standard deviation of a minimum of three biological replicates.

**Figure S4. Plasmid-borne copies of CASDH and CASDC do not rescue each other's null mutations.** Growth measured by  $OD_{600}$  (blue bars) and biofilm formation as  $A_{600}/OD_{600}$  (red bars), assayed as in Fig. S1 for *A. tumefaciens* C58 and derivatives. Plasmid harboring strains were induced with 500  $\mu$ M IPTG. Values expressed as percent wild type. Error bars show the standard deviation of a minimum of three biological replicates.

**Figure S5. Growth rescue and biofilm control of the CASDH mutant by spermidine and norspermidine.** Growth of the  $\Delta$ CASDH mutant with spermidine (A) and norspermidine (B) measured by  $OD_{600}$  and biofilm formation as assayed as in Fig. S1. All values expressed as %WT and error bars show the standard deviation of a minimum of three biological replicates.. For the samples with no supplemental polyamines  $A_{600}$  readings were used instead of  $A_{600}/OD_{600}$  to avoid the very low growth due to polyamine auxotrophy from artificially inflating the reading.

**Figure S6. Expression of *hss* gene is not activated under conditions that cause elevated Hspd levels.**  $\beta$ -galactosidase specific activity presented in Miller Units from ATGN-grown cultures in *A. tumefaciens* C58 and derivatives harboring a plasmid-borne

*P<sub>hss</sub>-lacZ* fusion. Error bars show the standard deviation of a minimum of three biological replicates. P value, \*, < 0.06)

| <b>Table S1. Strains and plasmids</b>                  |                                                                                         |                            |
|--------------------------------------------------------|-----------------------------------------------------------------------------------------|----------------------------|
| Strain or plasmid                                      | Relevant characteristic(s) <sup>a</sup>                                                 | Reference or source        |
| <b><i>A. tumefaciens</i></b>                           |                                                                                         |                            |
| C58                                                    | Nopaline type strain; pTiC58; pAtC58                                                    | (1)                        |
| C58-YW1                                                | C58 $\Delta$ <i>cel</i> $\Delta$ <i>exoA</i> $\Delta$ <i>chvAB</i> $\Delta$ <i>crdS</i> | This lab                   |
| C58-YW2                                                | C58 $\Delta$ <i>upp</i> $\Delta$ <i>exoA</i> $\Delta$ <i>chvAB</i> $\Delta$ <i>crdS</i> | This lab                   |
| C58 $\Delta$ <i>odc</i><br>( $\Delta$ <i>Atu3196</i> ) | In-frame deletion of <i>odc</i> ( <i>Atu3196</i> ) in C58 background                    | This study                 |
| C58-YW1- $\Delta$ <i>odc</i>                           | In-frame deletion of <i>odc</i> ( <i>Atu3196</i> ) in C58-YW1 background                | This study                 |
| C58-YW2- $\Delta$ <i>odc</i>                           | In-frame deletion of <i>odc</i> ( <i>Atu3196</i> ) in C58-YW2 background                | This study                 |
| C58 $\Delta$ CASDH<br>( $\Delta$ <i>Atu4170</i> )      | In-frame deletion of CASDH ( <i>Atu4170</i> ) in C58 background                         | This study                 |
| C58 $\Delta$ CASDC<br>( $\Delta$ <i>Atu4169</i> )      | In-frame deletion of CASDC ( <i>Atu4169</i> ) in C58 background                         | This study                 |
| C58 $\Delta$ <i>hss</i><br>( $\Delta$ <i>Atu3768</i> ) | In-frame deletion of <i>hss</i> ( <i>Atu3768</i> ) in C58 background                    | This study                 |
| <b><i>E. coli</i> strains</b>                          |                                                                                         |                            |
| DH5 $\alpha$ / $\lambda$ <i>pir</i>                    | $\lambda$ <i>pir</i> , cloning strain                                                   | (2)                        |
| S17-1/ $\lambda$ <i>pir</i>                            | $\lambda$ <i>pir</i> , Tra+, cloning strain                                             | (3)                        |
| TOP10F'                                                | Cloning strain                                                                          | Invitrogen                 |
| <b>Plasmids</b>                                        |                                                                                         |                            |
| pGEM-T easy                                            | PCR cloning vector; amp <sup>R</sup>                                                    | Promega                    |
| pNPTS138                                               | colE1 origin; <i>sacB</i> (Suc <sup>S</sup> ); Kan <sup>R</sup>                         | MRK Alley<br>(unpublished) |
| pRA301                                                 | Broad host range, promoterless <i>lacZ</i> , pVS1, Sp <sup>R</sup>                      | (4)                        |
| pAtu3196-de                                            | pNPTS138 carrying <i>Atu3196</i> SOE deletion                                           | This study                 |

|                                 |                                                                                        |            |
|---------------------------------|----------------------------------------------------------------------------------------|------------|
|                                 | fragment                                                                               |            |
| pAtu4169-de                     | pNPTS138 carrying <i>Atu4169</i> SOE deletion fragment                                 | This study |
| pAtu4170-de                     | pNPTS138 carrying <i>Atu4170</i> SOE deletion fragment                                 | This study |
| pspeB-de                        | pNPTS138 carrying <i>speB</i> SOE deletion fragment                                    | This study |
| phss-de                         | pNPTS138 carrying <i>Atu3768</i> SOE deletion fragment                                 | This study |
| pSRK-Km                         | Broad host range $P_{lac}$ expression vector; <i>lacIQ</i> ; Kan <sup>R</sup>          | (5)        |
| $P_{lac}$ - <i>odc</i>          | $P_{lac}::Atu3196$ in pSRKKm                                                           | This study |
| $P_{lac}$ -CASDH (Atu4170)      | $P_{lac}::CASDH$ (Atu4170) in pSRK-Km                                                  | This study |
| $P_{lac}$ -CASDC <i>Atu4169</i> | $P_{lac}::CASDC$ (Atu4170) in pSRK-Km                                                  | This study |
| $P_{lac}$ - <i>dcpA</i>         | $P_{lac}::dcpA$ in pSRK-Km                                                             | This study |
| $P_{hss}$ - <i>lacZ</i>         | Upstream region of <i>hss</i> (Atu3768) translationally fused to <i>lacZ</i> in pRA301 | This study |

**Table S2. Primer Sequences**

| Primer         | Restriction Site <sup>a</sup> | Sequence <sup>b</sup>                     |
|----------------|-------------------------------|-------------------------------------------|
| De3196-1       | SpeI                          | actagtCGGTCCGATGTATTATCTCA                |
| De3196-2       | NE                            | aagcttgggtaccgaattcCTTCATGCACTTTCCCATAG   |
| De3196-3       | NE                            | gaattcgggtaccaagcttTGAGCCCACGATGGTAGG     |
| De3196-4       | SphI                          | gcatgcAACCGTGTCTGCTATACCG                 |
| De4169-1       | SpeI                          | actagtTCAGGAGAGCAAGAACGAAAC               |
| De4169-2       | NE                            | aagcttgggtaccgaattcCAGCATGTCTGTTTCACATATT |
| De4169-3       | NE                            | gaattcgggtaccaagcttTAAAACCCTGTTTCAACATCC  |
| De4169-4       | SphI                          | gcatgcTTCCACTCGTAGTTTCCGTAC               |
| De4170-1       | SpeI                          | actagtAAATATGGCGTGCAGGTCTAT               |
| De4170-2       | NE                            | aagcttgggtaccgaattcCTTCATTTTCAGGTGATGCCTC |
| De4170-3       | NE                            | gaattcgggtaccaagcttGAGTTCTAAGCGCAGCATTCT  |
| De4170-4       | SphI                          | gcatgcAAGGACATGATGCTCGAAAAG               |
| DeSpeB-1       | SpeI                          | actagtCACGTCCGCAAGGTTGATAC                |
| DeSpeB-2       | NE                            | aagcttgggtaccgaattcGATTGTTTTGGCCGGCATAT   |
| DeSpeB-3       | NE                            | gaattcgggtaccaagcttGGCTGACGAATAAAACGGCA   |
| DeSpeB-4       | SphI                          | gcatgcGCATTGACACTGACCGGATA                |
| Com3196_up     | NdeI                          | CTGAcataTGACGACTGCACGCATTCTC              |
| Com3196_down   | HindIII                       | ACTGaagcttCCTAGATGACGTAAGCCTTCA           |
| Com4169-up     | BamHI                         | GTCAggatccCCGACCTTGACTTCAATCAA            |
| Com4169-down   | HindIII                       | AGTCaagcttAGGGATAAGCTTCGTTGGAT            |
| Com4170-up     | NdeI                          | GCATcatATGAAGAAGAACGTTCTGATC              |
| Com4170-down   | KpnI                          | GCATggtaccTGTCTCTATCCGTCAAGAATG           |
| DeHss-1        | SpeI                          | ACTAGTgccgggactgtgccgagagca               |
| DeHss-2        | NE                            | AAGCTTGGTACCGAATTctcaatttccttttcagccaat   |
| DeHss-3        | NE                            | GAATTCGGTACCAAGCTTcggatcggcgtctcatatttg   |
| DeHss-4        | NheI                          | GCTAGCctggctgttcgctccgt                   |
| Phss-lacZ-up   | EcoRI                         | GAATTctcaacaggtagctcc                     |
| Phss-lacZ-down | XbaI                          | TCTAGACATtcgtcaatttcctt                   |
| Pplac-5'       |                               | CTTCCGGCTCGTATGTTGTGTGG                   |
| MarRSeq        |                               | CGGGTATCGCTCTTGAAGGGA                     |
| MarTDL2        |                               | GACACGGGCCTCGANGNNCNTNGG                  |
| MarLSeq        |                               | GGGAATCATTTGAAGGTTGGT                     |
| MarTDR1        |                               | CAACCGTGGCGGGGNTNCNNGNCNCG                |
| M13-forward    |                               | CGCCAGGGTTTTCCAGTCACGAC                   |
| M13-reverse    |                               | TCACACAGGAAACAGCTATGAC                    |

<sup>a</sup>NE; No site was engineered

<sup>b</sup>Upper case sequence anneals to target; lower case are engineered into oligonucleotides but do not anneal with target sequences in the genome.

## Supplemental References

1. **Watson B, Currier TC, Gordon MP, Chilton MD, Nester EW.** . 1975. Plasmid Required for Virulence of *Agrobacterium tumefaciens*. . J. Bacteriol. **123**:255-264.
2. **Chiang SL, and Rubin EJ.** 2002. Construction of a mariner-based transposon for epitope-tagging and genomic targeting. Gene **296**:179-185.
3. **Hibbing ME, Fuqua C.** 2011. Antiparallel and interlinked control of cellular iron levels by the Irr and RirA regulators of *Agrobacterium tumefaciens*. J. Bacteriol. **193**:3461-3472.
4. **Akakura R, Winans SC.** 2002. Constitutive mutations of the OccR regulatory protein affect DNA bending in response to metabolites released from plant tumors. J. Biol. Chem. **277**:5866-5874.
5. **Khan SR, Gaines J, Roop RM, Farrand SK.** 2008. Broad-host-range expression vectors with tightly regulated promoters and their use to examine the influence of TraR and TraM expression on Ti plasmid quorum sensing. . Appl. Environ. Microbiol. **74**:5053-5062.
